# Supplementary material
Source: publisher site journal article supplement (https://www.dovepress.com/get_supplementary_file.php?f=188364S4.xlsx)
Supplement: Supplementary file 1 [file get_supplementary_file.php]

## Sheet: Table S4
Pathway ID	Pathway Name	Level 1	Level 2	Term Candidate Gene Num	Total Candidate Gene Num	Term Gene Num	Total Gene Num	Rich Ratio	P value	Q value
ko04360	Axon guidance	Organismal Systems	Development	39	687	262	9609	0.0567686	8.66e-06	0.00271123
ko05202	Transcriptional misregulation in cancer	Human Diseases	Cancers: Overview	36	687	263	9609	0.0524017	0.00011572	0.0181101
ko04068	FoxO signaling pathway	Environmental Information Processing	Signal transduction	24	687	159	9609	0.0349345	0.00037241	0.0348753
ko05206	MicroRNAs in cancer	Human Diseases	Cancers: Overview	31	687	230	9609	0.0451237	0.000445691	0.0348753
ko04380	Osteoclast differentiation	Organismal Systems	Development	25	687	176	9609	0.0363901	0.000718774	0.0445396
ko04630	Jak-STAT signaling pathway	Environmental Information Processing	Signal transduction	26	687	188	9609	0.0378457	0.000853794	0.0445396
ko00564	Glycerophospholipid metabolism	Metabolism	Lipid metabolism	19	687	123	9609	0.0276565	0.00111033	0.0496476
ko00561	Glycerolipid metabolism	Metabolism	Lipid metabolism	13	687	73	9609	0.0189229	0.00180152	0.0546809
ko04310	Wnt signaling pathway	Environmental Information Processing	Signal transduction	27	687	209	9609	0.0393013	0.00192169	0.0546809
ko04668	TNF signaling pathway	Environmental Information Processing	Signal transduction	21	687	147	9609	0.0305677	0.00173141	0.0546809
ko05231	Choline metabolism in cancer	Human Diseases	Cancers: Overview	19	687	127	9609	0.0276565	0.00163622	0.0546809
ko00562	Inositol phosphate metabolism	Metabolism	Carbohydrate metabolism	15	687	96	9609	0.0218341	0.00319034	0.0769459
ko04150	mTOR signaling pathway	Environmental Information Processing	Signal transduction	26	687	206	9609	0.0378457	0.00319584	0.0769459
ko04070	Phosphatidylinositol signaling system	Environmental Information Processing	Signal transduction	21	687	158	9609	0.0305677	0.00419047	0.0874411
ko04510	Focal adhesion	Cellular Processes	Cellular community - eukaryotes	38	687	341	9609	0.055313	0.00402428	0.0874411
ko04550	Signaling pathways regulating pluripotency of stem cells	Cellular Processes	Cellular community - eukaryotes	25	687	201	9609	0.0363901	0.00460397	0.0900653
ko04072	Phospholipase D signaling pathway	Environmental Information Processing	Signal transduction	25	687	206	9609	0.0363901	0.00631238	0.116222
ko04950	Maturity onset diabetes of the young	Human Diseases	Endocrine and metabolic diseases	7	687	33	9609	0.0101892	0.00768763	0.133679
ko00603	Glycosphingolipid biosynthesis - globo and isoglobo series	Metabolism	Glycan biosynthesis and metabolism	5	687	19	9609	0.00727802	0.0092174	0.138039
ko04012	ErbB signaling pathway	Environmental Information Processing	Signal transduction	16	687	118	9609	0.0232897	0.00962394	0.138039
ko04350	TGF-beta signaling pathway	Environmental Information Processing	Signal transduction	16	687	118	9609	0.0232897	0.00962394	0.138039
ko05146	Amoebiasis	Human Diseases	Infectious diseases: Parasitic	18	687	139	9609	0.0262009	0.00999887	0.138039
ko05166	HTLV-I infection	Human Diseases	Infectious diseases: Viral	34	687	315	9609	0.0494905	0.0101434	0.138039
ko04960	Aldosterone-regulated sodium reabsorption	Organismal Systems	Excretory system	9	687	52	9609	0.0131004	0.0105997	0.138237
ko05200	Pathways in cancer	Human Diseases	Cancers: Overview	68	687	725	9609	0.0989811	0.0114029	0.142764
ko00604	Glycosphingolipid biosynthesis - ganglio series	Metabolism	Glycan biosynthesis and metabolism	5	687	22	9609	0.00727802	0.0174764	0.171607
ko04010	MAPK signaling pathway	Environmental Information Processing	Signal transduction	40	687	397	9609	0.0582242	0.016748	0.171607
ko04151	PI3K-Akt signaling pathway	Environmental Information Processing	Signal transduction	47	687	478	9609	0.0684134	0.0152391	0.171607
ko04390	Hippo signaling pathway	Environmental Information Processing	Signal transduction	26	687	236	9609	0.0378457	0.017924	0.171607
ko04662	B cell receptor signaling pathway	Organismal Systems	Immune system	13	687	95	9609	0.0189229	0.0172556	0.171607
ko04810	Regulation of actin cytoskeleton	Cellular Processes	Cell motility	32	687	305	9609	0.0465793	0.0180927	0.171607
ko05222	Small cell lung cancer	Human Diseases	Cancers: Specific types	17	687	134	9609	0.0247453	0.0146464	0.171607
ko05322	Systemic lupus erythematosus	Human Diseases	Immune diseases	19	687	156	9609	0.0276565	0.0154173	0.171607
ko05221	Acute myeloid leukemia	Human Diseases	Cancers: Specific types	12	687	88	9609	0.0174672	0.0221902	0.20428
ko01522	Endocrine resistance	Human Diseases	Drug resistance: Antineoplastic	17	687	142	9609	0.0247453	0.0246287	0.220251
ko04062	Chemokine signaling pathway	Organismal Systems	Immune system	25	687	232	9609	0.0363901	0.0255164	0.221851
ko05205	Proteoglycans in cancer	Human Diseases	Cancers: Overview	31	687	304	9609	0.0451237	0.0281334	0.237993
ko01521	EGFR tyrosine kinase inhibitor resistance	Human Diseases	Drug resistance: Antineoplastic	13	687	102	9609	0.0189229	0.0293703	0.241918
ko00260	Glycine, serine and threonine metabolism	Metabolism	Amino acid metabolism	7	687	45	9609	0.0101892	0.039022	0.27142
ko04213	Longevity regulating pathway - multiple species	Organismal Systems	Aging	10	687	74	9609	0.014556	0.0369618	0.27142
ko04917	Prolactin signaling pathway	Organismal Systems	Endocrine system	11	687	85	9609	0.0160116	0.0389931	0.27142
ko04921	Oxytocin signaling pathway	Organismal Systems	Endocrine system	23	687	217	9609	0.0334789	0.0368119	0.27142
ko04923	Regulation of lipolysis in adipocytes	Organismal Systems	Endocrine system	10	687	74	9609	0.014556	0.0369618	0.27142
ko05224	Breast cancer	Human Diseases	Cancers: Specific types	23	687	218	9609	0.0334789	0.0384994	0.27142
ko05226	Gastric cancer	Human Diseases	Cancers: Specific types	21	687	193	9609	0.0305677	0.0350364	0.27142
ko05213	Endometrial cancer	Human Diseases	Cancers: Specific types	10	687	76	9609	0.014556	0.0432835	0.294516
ko05220	Chronic myeloid leukemia	Human Diseases	Cancers: Specific types	13	687	109	9609	0.0189229	0.0467392	0.311263
ko05034	Alcoholism	Human Diseases	Substance dependence	24	687	237	9609	0.0349345	0.052379	0.341554
ko05225	Hepatocellular carcinoma	Human Diseases	Cancers: Specific types	23	687	227	9609	0.0334789	0.0563504	0.359952
ko05132	Salmonella infection	Human Diseases	Infectious diseases: Bacterial	13	687	114	9609	0.0189229	0.0628367	0.393358
ko04015	Rap1 signaling pathway	Environmental Information Processing	Signal transduction	31	687	328	9609	0.0451237	0.0663211	0.396158
ko04915	Estrogen signaling pathway	Organismal Systems	Endocrine system	16	687	149	9609	0.0232897	0.0662558	0.396158
ko05217	Basal cell carcinoma	Human Diseases	Cancers: Specific types	11	687	93	9609	0.0160116	0.067081	0.396158
ko04666	Fc gamma R-mediated phagocytosis	Organismal Systems	Immune system	14	687	128	9609	0.0203785	0.0727465	0.42166
ko00601	Glycosphingolipid biosynthesis - lacto and neolacto series	Metabolism	Glycan biosynthesis and metabolism	5	687	32	9609	0.00727802	0.0745677	0.424358
ko04660	T cell receptor signaling pathway	Organismal Systems	Immune system	14	687	129	9609	0.0203785	0.0765245	0.427718
ko04657	IL-17 signaling pathway	Organismal Systems	Immune system	16	687	153	9609	0.0232897	0.0798816	0.435294
ko05120	Epithelial cell signaling in Helicobacter pylori infection	Human Diseases	Infectious diseases: Bacterial	10	687	85	9609	0.014556	0.0806615	0.435294
ko04320	Dorso-ventral axis formation	Organismal Systems	Development	8	687	64	9609	0.0116448	0.0845065	0.448314
ko00270	Cysteine and methionine metabolism	Metabolism	Amino acid metabolism	8	687	65	9609	0.0116448	0.0906691	0.467131
ko05223	Non-small cell lung cancer	Human Diseases	Cancers: Specific types	10	687	87	9609	0.014556	0.0910384	0.467131
ko04014	Ras signaling pathway	Environmental Information Processing	Signal transduction	33	687	364	9609	0.0480349	0.0926696	0.467832
ko05165	Human papillomavirus infection	Human Diseases	Infectious diseases: Viral	43	687	491	9609	0.062591	0.0943299	0.468655
ko05134	Legionellosis	Human Diseases	Infectious diseases: Bacterial	10	687	88	9609	0.014556	0.0965129	0.472008
ko04670	Leukocyte transendothelial migration	Organismal Systems	Immune system	18	687	182	9609	0.0262009	0.0999421	0.473968
ko05160	Hepatitis C	Human Diseases	Infectious diseases: Viral	16	687	158	9609	0.0232897	0.0993228	0.473968
ko00532	Glycosaminoglycan biosynthesis - chondroitin sulfate / dermatan sulfate	Metabolism	Glycan biosynthesis and metabolism	4	687	26	9609	0.00582242	0.110832	0.490836
ko04212	Longevity regulating pathway - worm	Organismal Systems	Aging	11	687	102	9609	0.0160116	0.11134	0.490836
ko04514	Cell adhesion molecules (CAMs)	Environmental Information Processing	Signaling molecules and interaction	20	687	208	9609	0.0291121	0.107027	0.490836
ko04664	Fc epsilon RI signaling pathway	Organismal Systems	Immune system	11	687	102	9609	0.0160116	0.11134	0.490836
ko05230	Central carbon metabolism in cancer	Human Diseases	Cancers: Overview	8	687	68	9609	0.0116448	0.110663	0.490836
ko00565	Ether lipid metabolism	Metabolism	Lipid metabolism	8	687	70	9609	0.0116448	0.125221	0.541745
ko04512	ECM-receptor interaction	Environmental Information Processing	Signaling molecules and interaction	16	687	165	9609	0.0232897	0.131087	0.541745
ko04711	Circadian rhythm - fly	Organismal Systems	Environmental adaptation	2	687	9	9609	0.00291121	0.131542	0.541745
ko05032	Morphine addiction	Human Diseases	Substance dependence	12	687	117	9609	0.0174672	0.130615	0.541745
ko05323	Rheumatoid arthritis	Human Diseases	Immune diseases	11	687	105	9609	0.0160116	0.129116	0.541745
ko04211	Longevity regulating pathway	Organismal Systems	Aging	12	687	118	9609	0.0174672	0.13656	0.554846
ko05418	Fluid shear stress and atherosclerosis	Human Diseases	Cardiovascular diseases	21	687	228	9609	0.0305677	0.138268	0.554846
ko04620	Toll-like receptor signaling pathway	Organismal Systems	Immune system	13	687	133	9609	0.0189229	0.154876	0.585482
ko04920	Adipocytokine signaling pathway	Organismal Systems	Endocrine system	10	687	97	9609	0.014556	0.154152	0.585482
ko04978	Mineral absorption	Organismal Systems	Digestive system	7	687	62	9609	0.0101892	0.152331	0.585482
ko05144	Malaria	Human Diseases	Infectious diseases: Parasitic	7	687	62	9609	0.0101892	0.152331	0.585482
ko05214	Glioma	Human Diseases	Cancers: Specific types	12	687	121	9609	0.0174672	0.155256	0.585482
ko04540	Gap junction	Cellular Processes	Cellular community - eukaryotes	11	687	110	9609	0.0160116	0.161956	0.59638
ko04930	Type II diabetes mellitus	Human Diseases	Endocrine and metabolic diseases	7	687	63	9609	0.0101892	0.161548	0.59638
ko00534	Glycosaminoglycan biosynthesis - heparan sulfate / heparin	Metabolism	Glycan biosynthesis and metabolism	4	687	31	9609	0.00582242	0.177635	0.600117
ko00600	Sphingolipid metabolism	Metabolism	Lipid metabolism	8	687	75	9609	0.0116448	0.16567	0.600117
ko00900	Terpenoid backbone biosynthesis	Metabolism	Metabolism of terpenoids and polyketides	4	687	31	9609	0.00582242	0.177635	0.600117
ko04060	Cytokine-cytokine receptor interaction	Environmental Information Processing	Signaling molecules and interaction	25	687	288	9609	0.0363901	0.18031	0.600117
ko04066	HIF-1 signaling pathway	Environmental Information Processing	Signal transduction	12	687	124	9609	0.0174672	0.175198	0.600117
ko04071	Sphingolipid signaling pathway	Environmental Information Processing	Signal transduction	15	687	162	9609	0.0218341	0.182144	0.600117
ko04210	Apoptosis	Cellular Processes	Cell growth and death	18	687	199	9609	0.0262009	0.17937	0.600117
ko04340	Hedgehog signaling pathway	Environmental Information Processing	Signal transduction	7	687	64	9609	0.0101892	0.171009	0.600117
ko04750	Inflammatory mediator regulation of TRP channels	Organismal Systems	Sensory system	14	687	149	9609	0.0203785	0.17833	0.600117
ko04931	Insulin resistance	Human Diseases	Endocrine and metabolic diseases	13	687	135	9609	0.0189229	0.167372	0.600117
ko05169	Epstein-Barr virus infection	Human Diseases	Infectious diseases: Viral	23	687	264	9609	0.0334789	0.187686	0.611935
ko05211	Renal cell carcinoma	Human Diseases	Cancers: Specific types	9	687	90	9609	0.0131004	0.192853	0.6223
ko04144	Endocytosis	Cellular Processes	Transport and catabolism	31	687	370	9609	0.0451237	0.200044	0.625389
ko04370	VEGF signaling pathway	Environmental Information Processing	Signal transduction	8	687	79	9609	0.0116448	0.201803	0.625389
ko04961	Endocrine and other factor-regulated calcium reabsorption	Organismal Systems	Excretory system	7	687	67	9609	0.0101892	0.200762	0.625389
ko05210	Colorectal cancer	Human Diseases	Cancers: Specific types	9	687	91	9609	0.0131004	0.2015	0.625389
ko04710	Circadian rhythm	Organismal Systems	Environmental adaptation	4	687	33	9609	0.00582242	0.207447	0.636576
ko04064	NF-kappa B signaling pathway	Environmental Information Processing	Signal transduction	12	687	130	9609	0.0174672	0.218518	0.664041
ko00670	One carbon pool by folate	Metabolism	Metabolism of cofactors and vitamins	4	687	34	9609	0.00582242	0.22286	0.664134
ko04623	Cytosolic DNA-sensing pathway	Organismal Systems	Immune system	8	687	81	9609	0.0116448	0.220966	0.664134
ko04650	Natural killer cell mediated cytotoxicity	Organismal Systems	Immune system	14	687	156	9609	0.0203785	0.224914	0.664134
ko04013	MAPK signaling pathway - fly	Environmental Information Processing	Signal transduction	13	687	144	9609	0.0189229	0.229387	0.671011
ko01523	Antifolate resistance	Human Diseases	Drug resistance: Antineoplastic	5	687	47	9609	0.00727802	0.243579	0.683219
ko04024	cAMP signaling pathway	Environmental Information Processing	Signal transduction	23	687	275	9609	0.0334789	0.244571	0.683219
ko04217	Necroptosis	Cellular Processes	Cell growth and death	19	687	222	9609	0.0276565	0.23838	0.683219
ko04218	Cellular senescence	Cellular Processes	Cell growth and death	19	687	222	9609	0.0276565	0.23838	0.683219
ko05215	Prostate cancer	Human Diseases	Cancers: Specific types	11	687	121	9609	0.0160116	0.246657	0.683219
ko05219	Bladder cancer	Human Diseases	Cancers: Specific types	6	687	59	9609	0.00873362	0.244475	0.683219
ko04115	p53 signaling pathway	Cellular Processes	Cell growth and death	10	687	110	9609	0.014556	0.260561	0.7154
ko00410	beta-Alanine metabolism	Metabolism	Metabolism of other amino acids	4	687	37	9609	0.00582242	0.270659	0.715913
ko04216	Ferroptosis	Cellular Processes	Cell growth and death	5	687	49	9609	0.00727802	0.271248	0.715913
ko04611	Platelet activation	Organismal Systems	Immune system	15	687	175	9609	0.0218341	0.269158	0.715913
ko04621	NOD-like receptor signaling pathway	Organismal Systems	Immune system	21	687	253	9609	0.0305677	0.268321	0.715913
ko04933	AGE-RAGE signaling pathway in diabetic complications	Human Diseases	Endocrine and metabolic diseases	11	687	124	9609	0.0160116	0.272184	0.715913
ko05150	Staphylococcus aureus infection	Human Diseases	Infectious diseases: Bacterial	8	687	87	9609	0.0116448	0.282012	0.73558
ko00340	Histidine metabolism	Metabolism	Amino acid metabolism	3	687	27	9609	0.00436681	0.303591	0.742375
ko00533	Glycosaminoglycan biosynthesis - keratan sulfate	Metabolism	Glycan biosynthesis and metabolism	2	687	15	9609	0.00291121	0.291712	0.742375
ko00592	alpha-Linolenic acid metabolism	Metabolism	Lipid metabolism	4	687	39	9609	0.00582242	0.303445	0.742375
ko04152	AMPK signaling pathway	Environmental Information Processing	Signal transduction	14	687	166	9609	0.0203785	0.298994	0.742375
ko04926	Relaxin signaling pathway	Organismal Systems	Endocrine system	14	687	165	9609	0.0203785	0.291263	0.742375
ko05133	Pertussis	Human Diseases	Infectious diseases: Bacterial	11	687	127	9609	0.0160116	0.2985	0.742375
ko05161	Hepatitis B	Human Diseases	Infectious diseases: Viral	15	687	179	9609	0.0218341	0.29854	0.742375
ko05164	Influenza A	Human Diseases	Infectious diseases: Viral	20	687	244	9609	0.0291121	0.293874	0.742375
ko00780	Biotin metabolism	Metabolism	Metabolism of cofactors and vitamins	1	687	5	9609	0.0014556	0.309942	0.752031
ko04973	Carbohydrate digestion and absorption	Organismal Systems	Digestive system	5	687	52	9609	0.00727802	0.313863	0.755685
ko04614	Renin-angiotensin system	Organismal Systems	Endocrine system	3	687	28	9609	0.00436681	0.323697	0.771734
ko04659	Th17 cell differentiation	Organismal Systems	Immune system	11	687	130	9609	0.0160116	0.32546	0.771734
ko04140	Autophagy - animal	Cellular Processes	Transport and catabolism	15	687	184	9609	0.0218341	0.336504	0.78019
ko04745	Phototransduction - fly	Organismal Systems	Sensory system	7	687	79	9609	0.0101892	0.334902	0.78019
ko05167	Kaposi's sarcoma-associated herpesvirus infection	Human Diseases	Infectious diseases: Viral	20	687	250	9609	0.0291121	0.332708	0.78019
ko05414	Dilated cardiomyopathy (DCM)	Human Diseases	Cardiovascular diseases	11	687	132	9609	0.0160116	0.343717	0.791054
ko00591	Linoleic acid metabolism	Metabolism	Lipid metabolism	4	687	42	9609	0.00582242	0.353283	0.803301
ko00750	Vitamin B6 metabolism	Metabolism	Metabolism of cofactors and vitamins	1	687	6	9609	0.0014556	0.359304	0.803301
ko00981	Insect hormone biosynthesis	Metabolism	Metabolism of terpenoids and polyketides	1	687	6	9609	0.0014556	0.359304	0.803301
ko05140	Leishmaniasis	Human Diseases	Infectious diseases: Parasitic	8	687	94	9609	0.0116448	0.357828	0.803301
ko00640	Propanoate metabolism	Metabolism	Carbohydrate metabolism	4	687	43	9609	0.00582242	0.36994	0.821214
ko04612	Antigen processing and presentation	Organismal Systems	Immune system	9	687	109	9609	0.0131004	0.3772	0.831433
ko03020	RNA polymerase	Genetic Information Processing	Transcription	5	687	57	9609	0.00727802	0.386328	0.839727
ko05110	Vibrio cholerae infection	Human Diseases	Infectious diseases: Bacterial	6	687	70	9609	0.00873362	0.384767	0.839727
ko05100	Bacterial invasion of epithelial cells	Human Diseases	Infectious diseases: Bacterial	10	687	124	9609	0.014556	0.393953	0.84457
ko05410	Hypertrophic cardiomyopathy (HCM)	Human Diseases	Cardiovascular diseases	10	687	124	9609	0.014556	0.393953	0.84457
ko05031	Amphetamine addiction	Human Diseases	Substance dependence	9	687	111	9609	0.0131004	0.398002	0.847446
ko00590	Arachidonic acid metabolism	Metabolism	Lipid metabolism	8	687	99	9609	0.0116448	0.41329	0.874053
ko04610	Complement and coagulation cascades	Organismal Systems	Immune system	11	687	140	9609	0.0160116	0.418058	0.878202
ko04640	Hematopoietic cell lineage	Organismal Systems	Immune system	10	687	128	9609	0.014556	0.433299	0.886422
ko05130	Pathogenic Escherichia coli infection	Human Diseases	Infectious diseases: Bacterial	7	687	87	9609	0.0101892	0.430376	0.886422
ko05145	Toxoplasmosis	Human Diseases	Infectious diseases: Parasitic	12	687	155	9609	0.0174672	0.43082	0.886422
ko05218	Melanoma	Human Diseases	Cancers: Specific types	7	687	87	9609	0.0101892	0.430376	0.886422
ko00230	Purine metabolism	Metabolism	Nucleotide metabolism	18	687	238	9609	0.0262009	0.437449	0.88866
ko00515	Mannose type O-glycan biosynthesis	Metabolism	Glycan biosynthesis and metabolism	3	687	34	9609	0.00436681	0.442624	0.88866
ko04022	cGMP-PKG signaling pathway	Environmental Information Processing	Signal transduction	17	687	225	9609	0.0247453	0.442911	0.88866
ko04979	Cholesterol metabolism	Organismal Systems	Digestive system	6	687	75	9609	0.00873362	0.44982	0.895897
ko05340	Primary immunodeficiency	Human Diseases	Immune diseases	4	687	48	9609	0.00582242	0.452242	0.895897
ko01100	Metabolic pathways	Metabolism	Global and overview maps	123	687	1701	9609	0.179039	0.459612	0.904771
ko04724	Glutamatergic synapse	Organismal Systems	Nervous system	11	687	145	9609	0.0160116	0.464711	0.909091
ko04145	Phagosome	Cellular Processes	Transport and catabolism	16	687	216	9609	0.0232897	0.479297	0.926429
ko05412	Arrhythmogenic right ventricular cardiomyopathy (ARVC)	Human Diseases	Cardiovascular diseases	8	687	105	9609	0.0116448	0.479494	0.926429
ko00232	Caffeine metabolism	Metabolism	Biosynthesis of other secondary metabolites	1	687	9	9609	0.0014556	0.48722	0.935582
ko05203	Viral carcinogenesis	Human Diseases	Cancers: Overview	20	687	276	9609	0.0291121	0.509203	0.971832
ko03440	Homologous recombination	Genetic Information Processing	Replication and repair	5	687	66	9609	0.00727802	0.514194	0.97541
ko00330	Arginine and proline metabolism	Metabolism	Amino acid metabolism	5	687	67	9609	0.00727802	0.527787	0.995165
ko00010	Glycolysis / Gluconeogenesis	Metabolism	Carbohydrate metabolism	5	687	82	9609	0.00727802	0.706918	1
ko00020	Citrate cycle (TCA cycle)	Metabolism	Carbohydrate metabolism	1	687	40	9609	0.0014556	0.948874	1
ko00030	Pentose phosphate pathway	Metabolism	Carbohydrate metabolism	2	687	35	9609	0.00291121	0.725089	1
ko00052	Galactose metabolism	Metabolism	Carbohydrate metabolism	3	687	56	9609	0.00436681	0.774084	1
ko00053	Ascorbate and aldarate metabolism	Metabolism	Carbohydrate metabolism	2	687	35	9609	0.00291121	0.725089	1
ko00061	Fatty acid biosynthesis	Metabolism	Lipid metabolism	1	687	18	9609	0.0014556	0.737228	1
ko00062	Fatty acid elongation	Metabolism	Lipid metabolism	2	687	29	9609	0.00291121	0.624273	1
ko00071	Fatty acid degradation	Metabolism	Lipid metabolism	3	687	52	9609	0.00436681	0.72899	1
ko00072	Synthesis and degradation of ketone bodies	Metabolism	Lipid metabolism	1	687	12	9609	0.0014556	0.589627	1
ko00100	Steroid biosynthesis	Metabolism	Lipid metabolism	1	687	29	9609	0.0014556	0.884037	1
ko00120	Primary bile acid biosynthesis	Metabolism	Lipid metabolism	1	687	21	9609	0.0014556	0.789752	1
ko00130	Ubiquinone and other terpenoid-quinone biosynthesis	Metabolism	Metabolism of cofactors and vitamins	1	687	15	9609	0.0014556	0.671606	1
ko00140	Steroid hormone biosynthesis	Metabolism	Lipid metabolism	3	687	77	9609	0.00436681	0.920554	1
ko00190	Oxidative phosphorylation	Metabolism	Energy metabolism	5	687	155	9609	0.00727802	0.988561	1
ko00220	Arginine biosynthesis	Metabolism	Amino acid metabolism	1	687	23	9609	0.0014556	0.818803	1
ko00240	Pyrimidine metabolism	Metabolism	Nucleotide metabolism	10	687	145	9609	0.014556	0.59439	1
ko00250	Alanine, aspartate and glutamate metabolism	Metabolism	Amino acid metabolism	2	687	44	9609	0.00291121	0.832858	1
ko00280	Valine, leucine and isoleucine degradation	Metabolism	Amino acid metabolism	4	687	59	9609	0.00582242	0.616986	1
ko00310	Lysine degradation	Metabolism	Amino acid metabolism	6	687	105	9609	0.00873362	0.770937	1
ko00350	Tyrosine metabolism	Metabolism	Amino acid metabolism	2	687	51	9609	0.00291121	0.888554	1
ko00360	Phenylalanine metabolism	Metabolism	Amino acid metabolism	2	687	28	9609	0.00291121	0.60493	1
ko00380	Tryptophan metabolism	Metabolism	Amino acid metabolism	2	687	55	9609	0.00291121	0.9121	1
ko00450	Selenocompound metabolism	Metabolism	Metabolism of other amino acids	1	687	21	9609	0.0014556	0.789752	1
ko00480	Glutathione metabolism	Metabolism	Metabolism of other amino acids	4	687	67	9609	0.00582242	0.715322	1
ko00500	Starch and sucrose metabolism	Metabolism	Carbohydrate metabolism	1	687	43	9609	0.0014556	0.959115	1
ko00510	N-Glycan biosynthesis	Metabolism	Glycan biosynthesis and metabolism	5	687	81	9609	0.00727802	0.696609	1
ko00511	Other glycan degradation	Metabolism	Glycan biosynthesis and metabolism	1	687	25	9609	0.0014556	0.843845	1
ko00512	Mucin type O-glycan biosynthesis	Metabolism	Glycan biosynthesis and metabolism	3	687	40	9609	0.00436681	0.552567	1
ko00514	Other types of O-glycan biosynthesis	Metabolism	Glycan biosynthesis and metabolism	3	687	43	9609	0.00436681	0.60248	1
ko00520	Amino sugar and nucleotide sugar metabolism	Metabolism	Carbohydrate metabolism	6	687	88	9609	0.00873362	0.608159	1
ko00531	Glycosaminoglycan degradation	Metabolism	Glycan biosynthesis and metabolism	1	687	26	9609	0.0014556	0.855039	1
ko00620	Pyruvate metabolism	Metabolism	Carbohydrate metabolism	4	687	57	9609	0.00582242	0.58935	1
ko00630	Glyoxylate and dicarboxylate metabolism	Metabolism	Carbohydrate metabolism	3	687	41	9609	0.00436681	0.569615	1
ko00650	Butanoate metabolism	Metabolism	Carbohydrate metabolism	2	687	42	9609	0.00291121	0.812843	1
ko00730	Thiamine metabolism	Metabolism	Metabolism of cofactors and vitamins	1	687	18	9609	0.0014556	0.737228	1
ko00770	Pantothenate and CoA biosynthesis	Metabolism	Metabolism of cofactors and vitamins	1	687	22	9609	0.0014556	0.804816	1
ko00790	Folate biosynthesis	Metabolism	Metabolism of cofactors and vitamins	1	687	38	9609	0.0014556	0.940661	1
ko00830	Retinol metabolism	Metabolism	Metabolism of cofactors and vitamins	5	687	78	9609	0.00727802	0.66421	1
ko00860	Porphyrin and chlorophyll metabolism	Metabolism	Metabolism of cofactors and vitamins	1	687	50	9609	0.0014556	0.975738	1
ko00910	Nitrogen metabolism	Metabolism	Energy metabolism	1	687	23	9609	0.0014556	0.818803	1
ko00920	Sulfur metabolism	Metabolism	Energy metabolism	1	687	16	9609	0.0014556	0.695122	1
ko00980	Metabolism of xenobiotics by cytochrome P450	Metabolism	Xenobiotics biodegradation and metabolism	2	687	92	9609	0.00291121	0.99143	1
ko00982	Drug metabolism - cytochrome P450	Metabolism	Xenobiotics biodegradation and metabolism	2	687	82	9609	0.00291121	0.983623	1
ko00983	Drug metabolism - other enzymes	Metabolism	Xenobiotics biodegradation and metabolism	4	687	62	9609	0.00582242	0.656195	1
ko01040	Biosynthesis of unsaturated fatty acids	Metabolism	Lipid metabolism	1	687	28	9609	0.0014556	0.875079	1
ko01200	Carbon metabolism	Metabolism	Global and overview maps	10	687	152	9609	0.014556	0.654302	1
ko01212	Fatty acid metabolism	Metabolism	Global and overview maps	4	687	62	9609	0.00582242	0.656195	1
ko01230	Biosynthesis of amino acids	Metabolism	Global and overview maps	5	687	90	9609	0.00727802	0.780525	1
ko01524	Platinum drug resistance	Human Diseases	Drug resistance: Antineoplastic	5	687	92	9609	0.00727802	0.796512	1
ko02010	ABC transporters	Environmental Information Processing	Membrane transport	2	687	51	9609	0.00291121	0.888554	1
ko03008	Ribosome biogenesis in eukaryotes	Genetic Information Processing	Translation	2	687	112	9609	0.00291121	0.997718	1
ko03010	Ribosome	Genetic Information Processing	Translation	7	687	182	9609	0.0101892	0.978901	1
ko03013	RNA transport	Genetic Information Processing	Translation	13	687	240	9609	0.0189229	0.884894	1
ko03015	mRNA surveillance pathway	Genetic Information Processing	Translation	5	687	147	9609	0.00727802	0.98281	1
ko03018	RNA degradation	Genetic Information Processing	Folding, sorting and degradation	7	687	130	9609	0.0101892	0.830529	1
ko03022	Basal transcription factors	Genetic Information Processing	Transcription	2	687	64	9609	0.00291121	0.949114	1
ko03030	DNA replication	Genetic Information Processing	Replication and repair	1	687	48	9609	0.0014556	0.971836	1
ko03040	Spliceosome	Genetic Information Processing	Transcription	8	687	204	9609	0.0116448	0.981538	1
ko03050	Proteasome	Genetic Information Processing	Folding, sorting and degradation	1	687	56	9609	0.0014556	0.984493	1
ko03320	PPAR signaling pathway	Organismal Systems	Endocrine system	7	687	109	9609	0.0101892	0.670568	1
ko03410	Base excision repair	Genetic Information Processing	Replication and repair	2	687	51	9609	0.00291121	0.888554	1
ko03420	Nucleotide excision repair	Genetic Information Processing	Replication and repair	3	687	69	9609	0.00436681	0.879854	1
ko03460	Fanconi anemia pathway	Genetic Information Processing	Replication and repair	2	687	70	9609	0.00291121	0.964942	1
ko04020	Calcium signaling pathway	Environmental Information Processing	Signal transduction	16	687	241	9609	0.0232897	0.658976	1
ko04080	Neuroactive ligand-receptor interaction	Environmental Information Processing	Signaling molecules and interaction	20	687	323	9609	0.0291121	0.781837	1
ko04110	Cell cycle	Cellular Processes	Cell growth and death	11	687	163	9609	0.0160116	0.623839	1
ko04114	Oocyte meiosis	Cellular Processes	Cell growth and death	7	687	185	9609	0.0101892	0.981566	1
ko04120	Ubiquitin mediated proteolysis	Genetic Information Processing	Folding, sorting and degradation	11	687	229	9609	0.0160116	0.943349	1
ko04122	Sulfur relay system	Genetic Information Processing	Folding, sorting and degradation	1	687	18	9609	0.0014556	0.737228	1
ko04130	SNARE interactions in vesicular transport	Genetic Information Processing	Folding, sorting and degradation	2	687	40	9609	0.00291121	0.790715	1
ko04137	Mitophagy - animal	Cellular Processes	Transport and catabolism	6	687	83	9609	0.00873362	0.549959	1
ko04141	Protein processing in endoplasmic reticulum	Genetic Information Processing	Folding, sorting and degradation	11	687	233	9609	0.0160116	0.950755	1
ko04142	Lysosome	Cellular Processes	Transport and catabolism	7	687	170	9609	0.0101892	0.964299	1
ko04146	Peroxisome	Cellular Processes	Transport and catabolism	4	687	107	9609	0.00582242	0.953186	1
ko04214	Apoptosis - fly	Cellular Processes	Cell growth and death	5	687	73	9609	0.00727802	0.605442	1
ko04215	Apoptosis - multiple species	Cellular Processes	Cell growth and death	3	687	44	9609	0.00436681	0.618278	1
ko04260	Cardiac muscle contraction	Organismal Systems	Circulatory system	4	687	89	9609	0.00582242	0.888547	1
ko04261	Adrenergic signaling in cardiomyocytes	Organismal Systems	Circulatory system	11	687	206	9609	0.0160116	0.879543	1
ko04270	Vascular smooth muscle contraction	Organismal Systems	Circulatory system	12	687	179	9609	0.0174672	0.634768	1
ko04330	Notch signaling pathway	Environmental Information Processing	Signal transduction	5	687	89	9609	0.00727802	0.772176	1
ko04341	Hedgehog signaling pathway - fly	Environmental Information Processing	Signal transduction	1	687	36	9609	0.0014556	0.93113	1
ko04371	Apelin signaling pathway	Environmental Information Processing	Signal transduction	10	687	192	9609	0.014556	0.888437	1
ko04391	Hippo signaling pathway - fly	Environmental Information Processing	Signal transduction	8	687	134	9609	0.0116448	0.751131	1
ko04392	Hippo signaling pathway - multiple species	Environmental Information Processing	Signal transduction	1	687	45	9609	0.0014556	0.964777	1
ko04520	Adherens junction	Cellular Processes	Cellular community - eukaryotes	6	687	112	9609	0.00873362	0.821145	1
ko04530	Tight junction	Cellular Processes	Cellular community - eukaryotes	16	687	278	9609	0.0232897	0.850276	1
ko04622	RIG-I-like receptor signaling pathway	Organismal Systems	Immune system	6	687	93	9609	0.00873362	0.661975	1
ko04624	Toll and Imd signaling pathway	Organismal Systems	Immune system	3	687	84	9609	0.00436681	0.945383	1
ko04658	Th1 and Th2 cell differentiation	Organismal Systems	Immune system	9	687	127	9609	0.0131004	0.560998	1
ko04672	Intestinal immune network for IgA production	Organismal Systems	Immune system	4	687	56	9609	0.00582242	0.575103	1
ko04713	Circadian entrainment	Organismal Systems	Environmental adaptation	9	687	140	9609	0.0131004	0.678298	1
ko04720	Long-term potentiation	Organismal Systems	Nervous system	4	687	109	9609	0.00582242	0.957674	1
ko04721	Synaptic vesicle cycle	Organismal Systems	Nervous system	6	687	83	9609	0.00873362	0.549959	1
ko04722	Neurotrophin signaling pathway	Organismal Systems	Nervous system	14	687	214	9609	0.0203785	0.675118	1
ko04723	Retrograde endocannabinoid signaling	Organismal Systems	Nervous system	8	687	170	9609	0.0116448	0.926431	1
ko04725	Cholinergic synapse	Organismal Systems	Nervous system	8	687	132	9609	0.0116448	0.7361	1
ko04726	Serotonergic synapse	Organismal Systems	Nervous system	7	687	138	9609	0.0101892	0.872412	1
ko04727	GABAergic synapse	Organismal Systems	Nervous system	5	687	106	9609	0.00727802	0.884071	1
ko04728	Dopaminergic synapse	Organismal Systems	Nervous system	10	687	192	9609	0.014556	0.888437	1
ko04730	Long-term depression	Organismal Systems	Nervous system	5	687	77	9609	0.00727802	0.652926	1
ko04740	Olfactory transduction	Organismal Systems	Sensory system	11	687	497	9609	0.0160116	1	1
ko04744	Phototransduction	Organismal Systems	Sensory system	2	687	62	9609	0.00291121	0.942463	1
ko04910	Insulin signaling pathway	Organismal Systems	Endocrine system	15	687	211	9609	0.0218341	0.548401	1
ko04911	Insulin secretion	Organismal Systems	Endocrine system	5	687	107	9609	0.00727802	0.888866	1
ko04912	GnRH signaling pathway	Organismal Systems	Endocrine system	10	687	142	9609	0.014556	0.567302	1
ko04913	Ovarian steroidogenesis	Organismal Systems	Endocrine system	4	687	61	9609	0.00582242	0.643431	1
ko04914	Progesterone-mediated oocyte maturation	Organismal Systems	Endocrine system	7	687	127	9609	0.0101892	0.812264	1
ko04916	Melanogenesis	Organismal Systems	Endocrine system	11	687	159	9609	0.0160116	0.590366	1
ko04918	Thyroid hormone synthesis	Organismal Systems	Endocrine system	4	687	98	9609	0.00582242	0.927084	1
ko04919	Thyroid hormone signaling pathway	Organismal Systems	Endocrine system	10	687	165	9609	0.014556	0.751147	1
ko04922	Glucagon signaling pathway	Organismal Systems	Endocrine system	9	687	138	9609	0.0131004	0.661528	1
ko04924	Renin secretion	Organismal Systems	Endocrine system	4	687	101	9609	0.00582242	0.936973	1
ko04925	Aldosterone synthesis and secretion	Organismal Systems	Endocrine system	8	687	131	9609	0.0116448	0.728355	1
ko04932	Non-alcoholic fatty liver disease (NAFLD)	Human Diseases	Endocrine and metabolic diseases	13	687	189	9609	0.0189229	0.599468	1
ko04940	Type I diabetes mellitus	Human Diseases	Endocrine and metabolic diseases	1	687	54	9609	0.0014556	0.981997	1
ko04962	Vasopressin-regulated water reabsorption	Organismal Systems	Excretory system	2	687	51	9609	0.00291121	0.888554	1
ko04964	Proximal tubule bicarbonate reclamation	Organismal Systems	Excretory system	1	687	29	9609	0.0014556	0.884037	1
ko04966	Collecting duct acid secretion	Organismal Systems	Excretory system	2	687	31	9609	0.00291121	0.66074	1
ko04970	Salivary secretion	Organismal Systems	Digestive system	5	687	157	9609	0.00727802	0.989683	1
ko04971	Gastric acid secretion	Organismal Systems	Digestive system	6	687	124	9609	0.00873362	0.886532	1
ko04972	Pancreatic secretion	Organismal Systems	Digestive system	6	687	118	9609	0.00873362	0.85688	1
ko04974	Protein digestion and absorption	Organismal Systems	Digestive system	9	687	155	9609	0.0131004	0.787254	1
ko04975	Fat digestion and absorption	Organismal Systems	Digestive system	2	687	53	9609	0.00291121	0.900978	1
ko04976	Bile secretion	Organismal Systems	Digestive system	4	687	89	9609	0.00582242	0.888547	1
ko04977	Vitamin digestion and absorption	Organismal Systems	Digestive system	2	687	38	9609	0.00291121	0.766311	1
ko05010	Alzheimer's disease	Human Diseases	Neurodegenerative diseases	3	687	224	9609	0.00436681	0.999991	1
ko05012	Parkinson's disease	Human Diseases	Neurodegenerative diseases	4	687	157	9609	0.00582242	0.996897	1
ko05014	Amyotrophic lateral sclerosis (ALS)	Human Diseases	Neurodegenerative diseases	3	687	69	9609	0.00436681	0.879854	1
ko05016	Huntington's disease	Human Diseases	Neurodegenerative diseases	7	687	244	9609	0.0101892	0.998979	1
ko05020	Prion diseases	Human Diseases	Neurodegenerative diseases	1	687	60	9609	0.0014556	0.988496	1
ko05030	Cocaine addiction	Human Diseases	Substance dependence	3	687	62	9609	0.00436681	0.830014	1
ko05033	Nicotine addiction	Human Diseases	Substance dependence	2	687	48	9609	0.00291121	0.86719	1
ko05131	Shigellosis	Human Diseases	Infectious diseases: Bacterial	7	687	112	9609	0.0101892	0.698067	1
ko05142	Chagas disease (American trypanosomiasis)	Human Diseases	Infectious diseases: Parasitic	8	687	119	9609	0.0116448	0.6239	1
ko05143	African trypanosomiasis	Human Diseases	Infectious diseases: Parasitic	3	687	45	9609	0.00436681	0.633645	1
ko05152	Tuberculosis	Human Diseases	Infectious diseases: Bacterial	16	687	267	9609	0.0232897	0.804276	1
ko05162	Measles	Human Diseases	Infectious diseases: Viral	10	687	160	9609	0.014556	0.716266	1
ko05168	Herpes simplex infection	Human Diseases	Infectious diseases: Viral	18	687	271	9609	0.0262009	0.663532	1
ko05204	Chemical carcinogenesis	Human Diseases	Cancers: Overview	6	687	101	9609	0.00873362	0.73787	1
ko05212	Pancreatic cancer	Human Diseases	Cancers: Specific types	4	687	91	9609	0.00582242	0.898396	1
ko05216	Thyroid cancer	Human Diseases	Cancers: Specific types	3	687	48	9609	0.00436681	0.677126	1
ko05310	Asthma	Human Diseases	Immune diseases	3	687	45	9609	0.00436681	0.633645	1
ko05320	Autoimmune thyroid disease	Human Diseases	Immune diseases	1	687	65	9609	0.0014556	0.992081	1
ko05321	Inflammatory bowel disease (IBD)	Human Diseases	Immune diseases	3	687	78	9609	0.00436681	0.924644	1
ko05330	Allograft rejection	Human Diseases	Immune diseases	1	687	46	9609	0.0014556	0.967307	1
ko05332	Graft-versus-host disease	Human Diseases	Immune diseases	1	687	38	9609	0.0014556	0.940661	1
ko05416	Viral myocarditis	Human Diseases	Cardiovascular diseases	5	687	95	9609	0.00727802	0.818762	1
